# Supplementary material
Source: PubMed Central journal article supplement (PMC2963401)
Supplement: supp_M110.143685_Zmijewski.pdf [file supp_M110.143685_Zmijewski.pdf]

## Supplement (on line)

### Figure legends

Fig. s1. The effects of  $H_2O_2$  on AMPK $\alpha\beta\gamma$  complex composition. *A and B.* Flag tagged AMPK $\alpha$  (A) or AMPK $\alpha$  (WT or the AMPK $\alpha$  1-335 truncation mutant) (B) were transiently expressed in HEK 293 cells and then the cells cultured with  $H_2O_2$  (0 or 250  $\mu$ M) for 15 minutes. The amounts of  $\beta$  and  $\gamma$  subunits interacting with Flag-AMPK $\alpha$  were determined after pull down with anti-Flag agarose followed by Western blot analysis with antibodies specific for the AMPK subunits. A second experiment provided similar results.

Fig. s2. Direct exposure to  $H_2O_2$  stimulates AMPK kinase activity. *A and B.* Recombinant AMPK $\alpha\beta\gamma$  complex (25 ng/sample) was pre-incubated with  $H_2O_2$  (0, 100, 200  $\mu$ M) for 10 minutes followed by determination of phosphorylation of the SAMS peptide at the indicated times. Representative autoradiogram (A) and quantitative analysis (B) of optical dot density is shown. Mean  $\pm$  SD,  $n = 3$ ,  $*P < 0.05$ ,  $**P < 0.01$ ,  $***P < 0.001$  compared to untreated. *C.* AMPK $\alpha\beta\gamma$  (100 ng/30  $\mu$ l sample) was incubated with  $H_2O_2$  (0, 100 or 200  $\mu$ M) for 10 minutes at room temperature and auto-phosphorylation initiated by inclusion of [ $^{32}$ P]-ATP. Samples were incubated for 30 minutes at room temperature followed by SDS-PAGE and auto-radiography. A representative autoradiogram shows the levels of phosphorylated AMPK $\alpha$  and  $\beta$  subunits. A second experiment provided similar increase in auto-phosphorylation of AMPK in a  $H_2O_2$  dependent manner.

Fig. s3. Metal dependent production of highly reactive hydroxyl radical inactivates catalytic function of AMPK. *A and B.* Recombinant AMPK $\alpha\beta\gamma$  was incubated with  $H_2O_2$  in the presence or absence of (A) copper (100 or 200  $\mu$ M) or (B) iron (200  $\mu$ M) for 10 minutes at room temperature and then AMPK activity determined after 30 minutes incubation with [ $^{32}$ P]-ATP and SAMS peptide. The mean AMPK activity is shown in (A) (Mean  $\pm$  SD,  $n = 3$ ,  $*P < 0.05$ ). Representative autoradiograms are shown and a second experiment confirmed the inhibitory effects of iron and  $H_2O_2$  on AMPK activity.

Fig. s4. AMPK oxidation and activation are present in the lungs of acatalasemic mice. *A and B.* Representative Western blots (A) and quantitative data (B) shows levels of AMPK $\alpha$ , phospho-Thr172AMPK $\alpha$ , and AMPK $\beta$  subunit in lung homogenates obtained from control or acatalasemic mice. (Mean  $\pm$  SD  $n = 4$  mice per group. *C.* Lung homogenates were incubated with BIAM (100  $\mu$ M) for 20 minutes at room temperature and the amounts of BIAM-AMPK $\alpha$ , phospho-T172AMPK $\alpha$ , and AMPK $\beta$  adduct formation determined using streptavidin-agarose pull down and Western blot analysis with specific antibodies to AMPK subunits.

**A**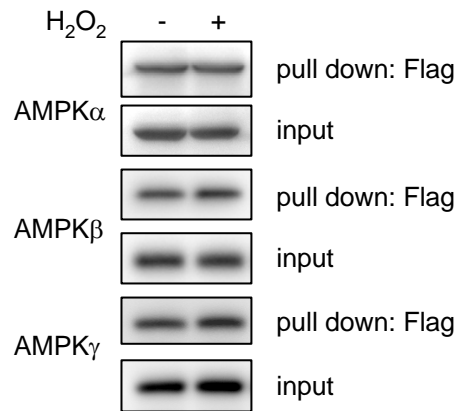**B**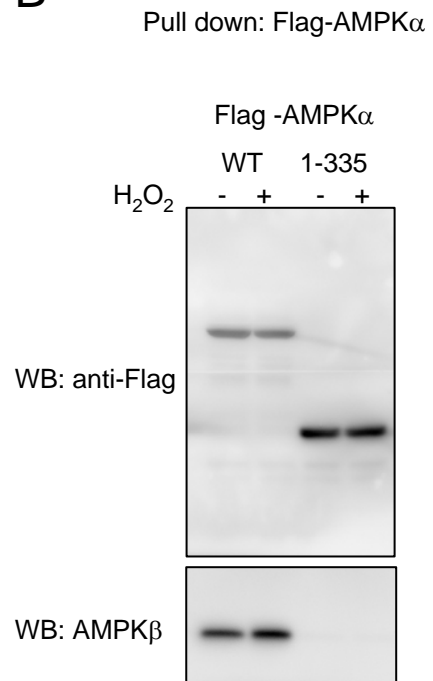**Figure s1**

**A**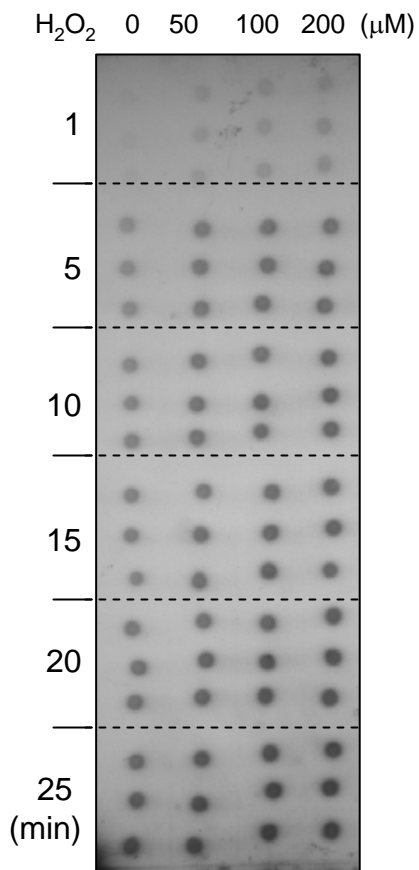**B**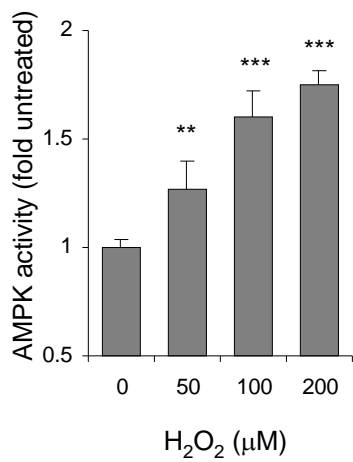**C**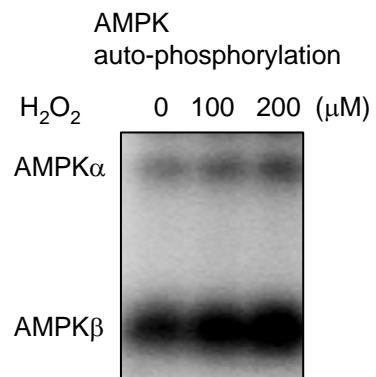**Figure s2**

A

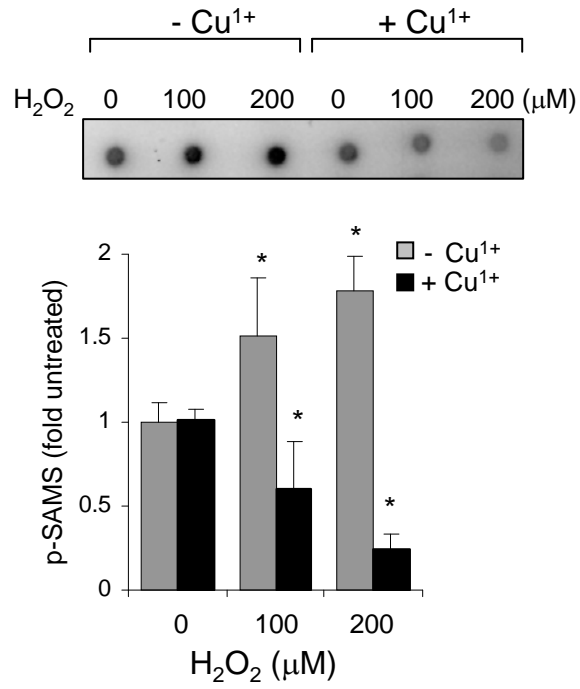

B

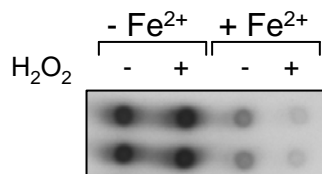

Figure s3

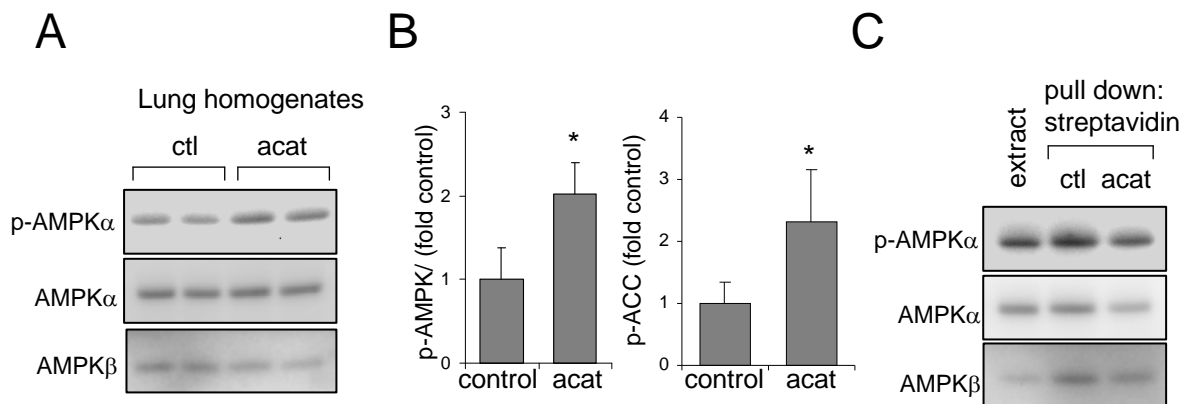

Figure S4
